# Supplementary material for: Does a presentation’s medium affect its message? PowerPoint, Prezi, and oral presentations
Source: PubMed Central journal article supplement (PMC5497950; doi:10.1371/journal.pone.0178774), 2017-07-05
Supplement: pone.0178774.s002.pdf [file pone.0178774.s002.pdf]

IDs Please enter the information below:

Your ID number:

Your initials:

1st Presenter's ID number:

Please watch the first presentation now and click next when the presentation is over.  
Thank you!

Evaluate Overall, how \_\_\_\_\_ was this presentation?

|            | Not at all<br>(1)     | Slightly (2)          | Somewhat<br>(3)       | Very (4)              | Extremely<br>(5)      |
|------------|-----------------------|-----------------------|-----------------------|-----------------------|-----------------------|
| Organized  | <input type="radio"/> | <input type="radio"/> | <input type="radio"/> | <input type="radio"/> | <input type="radio"/> |
| Engaging   | <input type="radio"/> | <input type="radio"/> | <input type="radio"/> | <input type="radio"/> | <input type="radio"/> |
| Realistic  | <input type="radio"/> | <input type="radio"/> | <input type="radio"/> | <input type="radio"/> | <input type="radio"/> |
| Persuasive | <input type="radio"/> | <input type="radio"/> | <input type="radio"/> | <input type="radio"/> | <input type="radio"/> |
| Effective  | <input type="radio"/> | <input type="radio"/> | <input type="radio"/> | <input type="radio"/> | <input type="radio"/> |

Comment1 Do you have any comments about the presentation and the presenter? How do you think it can be improved?

Next, you will be listening Presentation #2. When the presentation is over, click next.

ID\_Pres2 Please enter the information below:

2nd Presenter's ID number:

Eval\_Pres2 Overall, how \_\_\_\_\_ was this presentation?

|            | Not at all<br>(1)     | Slightly (2)          | Somewhat<br>(3)       | Very (4)              | Extremely<br>(5)      |
|------------|-----------------------|-----------------------|-----------------------|-----------------------|-----------------------|
| Organized  | <input type="radio"/> | <input type="radio"/> | <input type="radio"/> | <input type="radio"/> | <input type="radio"/> |
| Engaging   | <input type="radio"/> | <input type="radio"/> | <input type="radio"/> | <input type="radio"/> | <input type="radio"/> |
| Realistic  | <input type="radio"/> | <input type="radio"/> | <input type="radio"/> | <input type="radio"/> | <input type="radio"/> |
| Persuasive | <input type="radio"/> | <input type="radio"/> | <input type="radio"/> | <input type="radio"/> | <input type="radio"/> |
| Effective  | <input type="radio"/> | <input type="radio"/> | <input type="radio"/> | <input type="radio"/> | <input type="radio"/> |

Comment2 Do you have any comments about the presentation and the presenter? How do you think it can be improved?

Next, you will be listening Presentation #3. When the presentation is over, click next.

ID\_Pres3 Please enter the information below:

3rd Presenter's ID number:

Eval\_Pres3 Overall, how \_\_\_\_\_ was this presentation?

|            | Not at all<br>(1)     | Slightly (2)          | Somewhat<br>(3)       | Very (4)              | Extremely<br>(5)      |
|------------|-----------------------|-----------------------|-----------------------|-----------------------|-----------------------|
| Organized  | <input type="radio"/> | <input type="radio"/> | <input type="radio"/> | <input type="radio"/> | <input type="radio"/> |
| Engaging   | <input type="radio"/> | <input type="radio"/> | <input type="radio"/> | <input type="radio"/> | <input type="radio"/> |
| Realistic  | <input type="radio"/> | <input type="radio"/> | <input type="radio"/> | <input type="radio"/> | <input type="radio"/> |
| Persuasive | <input type="radio"/> | <input type="radio"/> | <input type="radio"/> | <input type="radio"/> | <input type="radio"/> |
| Effective  | <input type="radio"/> | <input type="radio"/> | <input type="radio"/> | <input type="radio"/> | <input type="radio"/> |

Comment3 Do you have any comments about the presentation and the presenter? How do you think it can be improved?

Next, you will compare the presentations on four different dimensions and on their overall effectiveness.

Comp\_Org Please rank the below presentations based on how organized they were? (1 - the best, 2 - intermediate, 3 - the worst)

- \_\_\_\_\_ 1st presentation
- \_\_\_\_\_ 2nd presentation
- \_\_\_\_\_ 3rd presentation

Rank\_engagine Please rank the below presentations based on how engaging they were? (1 - the best, 2 - intermediate, 3 - the worst)

- \_\_\_\_\_ 1st presentation
- \_\_\_\_\_ 2nd presentation
- \_\_\_\_\_ 3rd presentation

Rank\_persuasive Please rank the below presentations based on how persuasive they were? (1 - the best, 2 - intermediate, 3 - the worst)

- \_\_\_\_\_ 1st presentation
- \_\_\_\_\_ 2nd presentation
- \_\_\_\_\_ 3rd presentation

Rank\_realistic Please rank the below presentations based on how realistic they were? (1 - the best, 2 - intermediate, 3 - the worst)

- \_\_\_\_\_ 1st presentation
- \_\_\_\_\_ 2nd presentation
- \_\_\_\_\_ 3rd presentation

Rank\_overall Please rank the below presentations based on their overall effectiveness?  
(1 - the best, 2 - intermediate, 3 - the worst)

\_\_\_\_\_ 1st presentation

\_\_\_\_\_ 2nd presentation

\_\_\_\_\_ 3rd presentation

Rank\_format Please rank order the following presentation formats in terms of their general effectiveness, ignoring how well individual presenters (including today's) use that format. (1 - the best, 2 - intermediate, 3 - the worst)

\_\_\_\_\_ Prezi

\_\_\_\_\_ PowerPoint

\_\_\_\_\_ Oral presentation

Rank\_format\_OE Considering your answer to the previous question, please explain why you ordered the presentation formats as you did.

Feedback Do you have any general feedback about the study?
