# Supplementary material for: Does a presentation’s medium affect its message? PowerPoint, Prezi, and oral presentations
Source: PubMed Central journal article supplement (PMC5497950; doi:10.1371/journal.pone.0178774), 2017-07-05
Supplement: pone.0178774.s003.pdf [file pone.0178774.s003.pdf]

Welcome! Thank you for completing this brief questionnaire, which should take approximately 10 minutes to complete. Your thoughtfulness and honesty in answering these questions is extremely important to us. Finally, it is important that you complete this survey in one sitting, and do not try to answer any of the questions by googling things in another browser window or tab.

ID Please tell us about yourself:

Contact email address:

Age (in years):

Current occupation:

Initials:

Education What is the highest level of education?

- No schooling completed (4)
- Nursery school to 8th grade (5)
- Some high school, no diploma (6)
- High school graduate, diploma or the equivalent (for example: GED) (7)
- Some college credit, no degree (8)
- Trade/technical/vocational training (9)
- Associate degree (10)
- Bachelor's degree (11)
- Master's degree (12)
- Professional degree (13)
- Doctorate degree (14)

Language Which of the below best describes you?

- I am a native English speaker
- I am not a native English speaker but fluent in English
- I am not a native English speaker and am not fluent in English

Gender What is your gender identity?

- Male (1)
- Female (2)
- Other (3)

A note on language: When we use the term "presentation", we mean a formal, planned, and oral presentation of any duration, including a public speech, an academic lecture, a webinar, a class presentation, a wedding toast, a sermon, a product demonstration, a business presentation, and so on. Examples of things we do NOT mean are: a theatrical performance, an impromptu toast at dinner, and any presentation with no audience. When we say PowerPoint presentations, we mean presentations that were made using Microsoft PowerPoint, not other software such as Apple's Keynote. Also, when we refer to "oral presentation", we mean a presentation that is only spoken and does not include any visual aids or the use of presentation software.

Experience How experienced are you at making the following types of presentations?

|                   | Not at all Experienced (1) | Slightly Experienced (2) | Somewhat Experienced (3) | Very Experienced (4)  | Extremely Experienced (5) |
|-------------------|----------------------------|--------------------------|--------------------------|-----------------------|---------------------------|
| Oral Presentation | <input type="radio"/>      | <input type="radio"/>    | <input type="radio"/>    | <input type="radio"/> | <input type="radio"/>     |
| PowerPoint        | <input type="radio"/>      | <input type="radio"/>    | <input type="radio"/>    | <input type="radio"/> | <input type="radio"/>     |
| Prezi             | <input type="radio"/>      | <input type="radio"/>    | <input type="radio"/>    | <input type="radio"/> | <input type="radio"/>     |

Effective1 When you give a presentation, how effective are the following presentations for you?

|                   | Not at all Effective (1) | Slightly Effective (2) | Somewhat Effective (3) | Very Effective (4)    | Extremely Effective (5) |
|-------------------|--------------------------|------------------------|------------------------|-----------------------|-------------------------|
| Oral Presentation | <input type="radio"/>    | <input type="radio"/>  | <input type="radio"/>  | <input type="radio"/> | <input type="radio"/>   |
| PowerPoint        | <input type="radio"/>    | <input type="radio"/>  | <input type="radio"/>  | <input type="radio"/> | <input type="radio"/>   |
| Prezi             | <input type="radio"/>    | <input type="radio"/>  | <input type="radio"/>  | <input type="radio"/> | <input type="radio"/>   |

Effective2 When somebody else gives a presentation, how effective are the following types of presentations for you?

|                   | Not at all Effective (1) | Slightly Effective (2) | Somewhat Effective (3) | Very Effective (4)    | Extremely Effective (5) |
|-------------------|--------------------------|------------------------|------------------------|-----------------------|-------------------------|
| Oral Presentation | <input type="radio"/>    | <input type="radio"/>  | <input type="radio"/>  | <input type="radio"/> | <input type="radio"/>   |
| PowerPoint        | <input type="radio"/>    | <input type="radio"/>  | <input type="radio"/>  | <input type="radio"/> | <input type="radio"/>   |
| Prezi             | <input type="radio"/>    | <input type="radio"/>  | <input type="radio"/>  | <input type="radio"/> | <input type="radio"/>   |

ease How easy or difficult is it for you to make the following types of presentations?

|                      | Not at all<br>Difficult (1) | Slightly<br>Difficult (3) | Somewhat<br>Difficult (5) | Very<br>Difficult (6) | Extremely<br>Difficult (7) |
|----------------------|-----------------------------|---------------------------|---------------------------|-----------------------|----------------------------|
| Oral<br>Presentation | <input type="radio"/>       | <input type="radio"/>     | <input type="radio"/>     | <input type="radio"/> | <input type="radio"/>      |
| PowerPoint           | <input type="radio"/>       | <input type="radio"/>     | <input type="radio"/>     | <input type="radio"/> | <input type="radio"/>      |
| Prezi                | <input type="radio"/>       | <input type="radio"/>     | <input type="radio"/>     | <input type="radio"/> | <input type="radio"/>      |

Freq\_year In the last year, approximately how many of the following types of presentations did you make? (Please write "0" if you have not made any)

Oral Presentation:

PowerPoint:

Prezi:

Freq\_life In your lifetime, approximately how many of the following types of presentations have you made? (Please write "0" if you have not made any)

Oral Presentation:

PowerPoint:

Prezi:

Year For approximately how many years have you been making the following types of presentations?

Oral Presentation:

PowerPoint:

Prezi:

Pros Proponents of the three types of presentations claim particular advantages for each type of presentation. In the table below, try to match the presentation type with its claimed advantages. You can only select one presentation type for each advantage.

|                                                                             | Oral Presentation     | PowerPoint            | Prezi                 |
|-----------------------------------------------------------------------------|-----------------------|-----------------------|-----------------------|
| most easily allows you to create handouts and make notes to yourself        | <input type="radio"/> | <input type="radio"/> | <input type="radio"/> |
| most easily allows you to improvise during the presentation                 | <input type="radio"/> | <input type="radio"/> | <input type="radio"/> |
| best shows relationships and connections between parts of your presentation | <input type="radio"/> | <input type="radio"/> | <input type="radio"/> |
| most established, familiar, and reliable way to create visual aids          | <input type="radio"/> | <input type="radio"/> | <input type="radio"/> |
| best shows the big picture                                                  | <input type="radio"/> | <input type="radio"/> | <input type="radio"/> |
| simplicity                                                                  | <input type="radio"/> | <input type="radio"/> | <input type="radio"/> |
| best promotes personal connection between you and your audience             | <input type="radio"/> | <input type="radio"/> | <input type="radio"/> |
| most fun, dynamic, and engaging for your audience                           | <input type="radio"/> | <input type="radio"/> | <input type="radio"/> |
| most easily allows you to create tables and charts                          | <input type="radio"/> | <input type="radio"/> | <input type="radio"/> |

Cons Critics of the three types of presentations claim particular disadvantages of each type of presentation. In the table below, try to match presentation type with its claimed disadvantages. You can only select one presentation type for each disadvantage.

|                                                                          | Oral Presentation     | PowerPoint            | Prezi                 |
|--------------------------------------------------------------------------|-----------------------|-----------------------|-----------------------|
| makes it easy to overload your audience with information or distractions | <input type="radio"/> | <input type="radio"/> | <input type="radio"/> |
| encourages overuse of bullet points and text                             | <input type="radio"/> | <input type="radio"/> | <input type="radio"/> |
| expensive                                                                | <input type="radio"/> | <input type="radio"/> | <input type="radio"/> |
| unsophisticated                                                          | <input type="radio"/> | <input type="radio"/> | <input type="radio"/> |
| does not allow for visual communication or learning                      | <input type="radio"/> | <input type="radio"/> | <input type="radio"/> |
| hard to learn                                                            | <input type="radio"/> | <input type="radio"/> | <input type="radio"/> |
| provides no record of the presentation for later sharing or referencing  | <input type="radio"/> | <input type="radio"/> | <input type="radio"/> |
| encourages unoriginal, linear presentations                              | <input type="radio"/> | <input type="radio"/> | <input type="radio"/> |
| can disorient your audience                                              | <input type="radio"/> | <input type="radio"/> | <input type="radio"/> |

Functionality Please read the statements below and indicate whether or not Prezi and PowerPoint software has this functionality. You can select one, both, or neither software tool for each functionality.

|                                                                               | Prezi                    | PowerPoint               |
|-------------------------------------------------------------------------------|--------------------------|--------------------------|
| Add times to slides/frames                                                    | <input type="checkbox"/> | <input type="checkbox"/> |
| Use transformation tool to move, size and rotate content in your presentation | <input type="checkbox"/> | <input type="checkbox"/> |
| Create custom backgrounds                                                     | <input type="checkbox"/> | <input type="checkbox"/> |
| Use (+) button on the screen to zoom in                                       | <input type="checkbox"/> | <input type="checkbox"/> |
| Record narration while presenting                                             | <input type="checkbox"/> | <input type="checkbox"/> |
| Click "Present" button to start presenting                                    | <input type="checkbox"/> | <input type="checkbox"/> |
| Use path points to set sequence of your presentation content                  | <input type="checkbox"/> | <input type="checkbox"/> |
| Insert videos from YouTube                                                    | <input type="checkbox"/> | <input type="checkbox"/> |
| Click on the objects to zoom around while editing your presentation           | <input type="checkbox"/> | <input type="checkbox"/> |
| Import content from other presentations                                       | <input type="checkbox"/> | <input type="checkbox"/> |
| Print handouts                                                                | <input type="checkbox"/> | <input type="checkbox"/> |
| Import presentations that were created using other presentation software      | <input type="checkbox"/> | <input type="checkbox"/> |
| Double click to insert text                                                   | <input type="checkbox"/> | <input type="checkbox"/> |
| Stop presentation by pressing ESC                                             | <input type="checkbox"/> | <input type="checkbox"/> |

Next we will ask you to rate the quality of very short (10-20 second) samples of Prezi presentations. These videos have no sound or oral narration—this is on purpose so that you evaluate them based only on their visual aspects.

Prezi1 Please watch the four videos below, one at a time. When you are done watching them all, rank them from best to worst by clicking the button on the right side (1=best, 2 = good, 3 = bad, 4=worst). Feel free to watch the videos more than once if that helps you better evaluate them.

|                                                                                                                     | 1 | 2 | 3 | 4 |
|---------------------------------------------------------------------------------------------------------------------|---|---|---|---|
| Prezi1_video1 <a href="https://s3.amazonaws.com/prz/Relation_1.mp4">https://s3.amazonaws.com/prz/Relation_1.mp4</a> |   |   |   |   |
| Prezi1_video2 <a href="https://s3.amazonaws.com/prz/Relation_2.mp4">https://s3.amazonaws.com/prz/Relation_2.mp4</a> |   |   |   |   |
| Prezi1_video3 <a href="https://s3.amazonaws.com/prz/Relation_3.mp4">https://s3.amazonaws.com/prz/Relation_3.mp4</a> |   |   |   |   |

|                                                                                                                     |  |  |  |  |
|---------------------------------------------------------------------------------------------------------------------|--|--|--|--|
| Prezi1_video4 <a href="https://s3.amazonaws.com/prz/Relation_4.mp4">https://s3.amazonaws.com/prz/Relation_4.mp4</a> |  |  |  |  |
|---------------------------------------------------------------------------------------------------------------------|--|--|--|--|

Prezi2 Please watch the four videos below, one at a time. When you are done watching them all, rank them from best to worst by clicking the button on the right side (1=best, 2 = good, 3 = bad, 4=worst). Feel free to watch the videos more than once if that helps you better evaluate them.

|                                                                                                             | 1 | 2 | 3 | 4 |
|-------------------------------------------------------------------------------------------------------------|---|---|---|---|
| Prezi2_video1 <a href="https://s3.amazonaws.com/prz/Zoom_1.mp4">https://s3.amazonaws.com/prz/Zoom_1.mp4</a> |   |   |   |   |
| Prezi2_video2 <a href="https://s3.amazonaws.com/prz/Zoom_2.mp4">https://s3.amazonaws.com/prz/Zoom_2.mp4</a> |   |   |   |   |
| Prezi2_video3 <a href="https://s3.amazonaws.com/prz/Zoom_3.mp4">https://s3.amazonaws.com/prz/Zoom_3.mp4</a> |   |   |   |   |
| Prezi2_video4 <a href="https://s3.amazonaws.com/prz/Zoom_4.mp4">https://s3.amazonaws.com/prz/Zoom_4.mp4</a> |   |   |   |   |

Prezi3 Please watch the four videos below, one at a time. When you are done watching them all, rank them from best to worst by clicking the button on the right side (1=best, 2 = good, 3 = bad, 4=worst). Feel free to watch the videos more than once if that helps you better evaluate them.

|                                                                                                                     | 1 | 2 | 3 | 4 |
|---------------------------------------------------------------------------------------------------------------------|---|---|---|---|
| Prezi3_video1 <a href="https://s3.amazonaws.com/prz/metaphor_1.mp4">https://s3.amazonaws.com/prz/metaphor_1.mp4</a> |   |   |   |   |
| Prezi3_video2 <a href="https://s3.amazonaws.com/prz/metaphor_2.mp4">https://s3.amazonaws.com/prz/metaphor_2.mp4</a> |   |   |   |   |
| Prezi3_video3 <a href="https://s3.amazonaws.com/prz/metaphor_3.mp4">https://s3.amazonaws.com/prz/metaphor_3.mp4</a> |   |   |   |   |
| Prezi3_video4 <a href="https://s3.amazonaws.com/prz/metaphor_4.mp4">https://s3.amazonaws.com/prz/metaphor_4.mp4</a> |   |   |   |   |

Thank you again for completing the survey. You will receive an email from us within a few days.

ID Please fill in the form below.

ID (look at top right corner of the piece of paper you are given):

Initials:

In this activity, you will rate the quality of multiple presentations. A note on language: When we use the term "presentation", we mean a formal, planned, and oral presentation of any duration, including a public speech, an academic lecture, a webinar, a class presentation, a wedding toast, a sermon, a product demonstration, a business presentation, and so on. Examples of things we do NOT mean are: a theatrical performance, an impromptu toast at dinner, and any presentation with no audience. Also, when we refer to "oral presentation", we mean a presentation that is only spoken and does not include any visual aids or the use of presentation

software. Some presentations do not have narrative. This is on purpose. We want you to focus on the visual aspects on these presentations. Click next, when you are ready.

PPT1 Please watch the four videos below, one at a time. When you are done watching them all, rank them from best to worst by clicking the button on the right side (1=best, 2=good, 3=bad, 4=worst). Feel free to watch the videos more than once if that helps you better evaluate them.

|                                                                                                                 | 1 | 2 | 3 | 4 |
|-----------------------------------------------------------------------------------------------------------------|---|---|---|---|
| PPT1_video1 <a href="https://s3.amazonaws.com/prz/Graphic_1.mp4">https://s3.amazonaws.com/prz/Graphic_1.mp4</a> |   |   |   |   |
| PPT1_video2 <a href="https://s3.amazonaws.com/prz/Graphic_2.mp4">https://s3.amazonaws.com/prz/Graphic_2.mp4</a> |   |   |   |   |
| PPT1_video3 <a href="https://s3.amazonaws.com/prz/Graphic_3.mp4">https://s3.amazonaws.com/prz/Graphic_3.mp4</a> |   |   |   |   |
| PPT1_video4 <a href="https://s3.amazonaws.com/prz/Graphic_4.mp4">https://s3.amazonaws.com/prz/Graphic_4.mp4</a> |   |   |   |   |

PPT2 Please watch the four videos below, one at a time. When you are done watching them all, rank them from best to worst by clicking the button on the right side (1=best, 2=good, 3=bad, 4=worst). Feel free to watch the videos more than once if that helps you better evaluate them.

|                                                                                                               | 1 | 2 | 3 | 4 |
|---------------------------------------------------------------------------------------------------------------|---|---|---|---|
| PPT2_video1 <a href="https://s3.amazonaws.com/prz/charts_1.mp4">https://s3.amazonaws.com/prz/charts_1.mp4</a> |   |   |   |   |
| PPT2_video2 <a href="https://s3.amazonaws.com/prz/charts_2.mp4">https://s3.amazonaws.com/prz/charts_2.mp4</a> |   |   |   |   |
| PPT2_video3 <a href="https://s3.amazonaws.com/prz/charts_3.mp4">https://s3.amazonaws.com/prz/charts_3.mp4</a> |   |   |   |   |
| PPT2_video4 <a href="https://s3.amazonaws.com/prz/charts_4.mp4">https://s3.amazonaws.com/prz/charts_4.mp4</a> |   |   |   |   |

PPT3 Please watch the four videos below, one at a time. When you are done watching them all, rank them from best to worst by clicking the button on the right side (1=best, 2=good, 3=bad, 4=worst). Feel free to watch the videos more than once if that helps you better evaluate them.

|                                                                                                                      | 1 | 2 | 3 | 4 |
|----------------------------------------------------------------------------------------------------------------------|---|---|---|---|
| PPT3_video1<br><a href="https://www.youtube.com/watch?v=T9NntA2Ny4A">https://www.youtube.com/watch?v=T9NntA2Ny4A</a> |   |   |   |   |
| PPT3_video2<br><a href="https://www.youtube.com/watch?v=tNL2nZ4nZ7c">https://www.youtube.com/watch?v=tNL2nZ4nZ7c</a> |   |   |   |   |
| PPT3_video3<br><a href="https://www.youtube.com/watch?v=atQSf4ON6Xs">https://www.youtube.com/watch?v=atQSf4ON6Xs</a> |   |   |   |   |
| PPT3_video4<br><a href="https://www.youtube.com/watch?v=liXffWyMhXk">https://www.youtube.com/watch?v=liXffWyMhXk</a> |   |   |   |   |



Speaking1 Please watch the four videos below, one at a time. When you are done watching them all, rank them from best to worst by clicking the button on the right side (1=best, 2=good, 3=bad, 4=worst). Feel free to watch the videos more than once if that helps you better evaluate them.

|                                                  | 1 | 2 | 3 | 4 |
|--------------------------------------------------|---|---|---|---|
| Speaking1_video1<br>[video available by request] |   |   |   |   |
| Speaking1_video2<br>[video available by request] |   |   |   |   |
| Speaking1_video3<br>[video available by request] |   |   |   |   |
| Speaking1_video4<br>[video available by request] |   |   |   |   |

Speaking2 Please watch the four videos below, one at a time. When you are done watching them all, rank them from best to worst by clicking the button on the right side (1=best, 2=good, 3=bad, 4=worst). Feel free to watch the videos more than once if that helps you better evaluate them.

|                                                  | 1 | 2 | 3 | 4 |
|--------------------------------------------------|---|---|---|---|
| Speaking2_video1<br>[video available by request] |   |   |   |   |
| Speaking2_video2<br>[video available by request] |   |   |   |   |
| Speaking2_video3<br>[video available by request] |   |   |   |   |
| Speaking2_video4<br>[video available by request] |   |   |   |   |

Speaking3 Please watch the four videos below, one at a time. When you are done watching them all, rank them from best to worst by clicking the button on the right side (1=best, 2=good, 3=bad, 4=worst). Feel free to watch the videos more than once if that helps you better evaluate them.

|                                                  | 1 | 2 | 3 | 4 |
|--------------------------------------------------|---|---|---|---|
| Speaking3_video1<br>[video available by request] |   |   |   |   |
| Speaking3_video2<br>[video available by request] |   |   |   |   |
| Speaking3_video3<br>[video available by request] |   |   |   |   |
| Speaking3_video4<br>[video available by request] |   |   |   |   |
