# Supplementary material for: Does a presentation’s medium affect its message? PowerPoint, Prezi, and oral presentations
Source: PubMed Central journal article supplement (PMC5497950; doi:10.1371/journal.pone.0178774), 2017-07-05
Supplement: pone.0178774.s004.pdf [file pone.0178774.s004.pdf]

ID Please fill in the form below.

ID (1)

Convince1 How convincing do you think your presentation will be to [Company X]'s board members?

- Not at all convincing (1)
- Slightly convincing (2)
- Somewhat convincing (3)
- Very convincing (4)
- Extremely convincing (5)

Convince2 How much do you personally agree with the argument you made in your presentation?

- Strongly disagree (1)
- Somewhat disagree (2)
- Slightly disagree (3)
- Neither agree nor disagree (4)
- Slightly agree (5)
- Somewhat agree (6)
- Strongly agree (7)

Convince3 What do you think [Company X] should do?

- Definitely rejecti-Mart's offer (1)
- Probably rejecti-Mart's offer (2)
- Possibly rejecti-Mart's offer (3)
- Possibly accepti-Mart's offer (4)
- Probably accepti-Mart's offer (5)
- Definitely accepti-Mart's offer (6)

Reason Why do you think [Company X] should accept or reject i-Mart's offer?

MetaCog1 You are now going to be quizzed on the content of the presentation you just made. Please rate how well you think you will perform on this quiz.

- Extremely poorly (1)
- Very Poorly (2)
- Poorly (4)
- Fair (5)
- Well (6)
- Very Well (7)
- Extremely Well (8)

MetaCog2 How much do you think you understand the situation with [Company X] and i-Mart?

- Not at all (1)
- Slightly (2)
- Somewhat (3)
- Mostly (4)
- Fully (5)

Relation1 How much do you think [Company X]'s online community is related its other aspects below?

|                     | Not at all related (1) | Slightly related (2)  | Somewhat related (3)  | Very related (4)      | Extremely related (5) |
|---------------------|------------------------|-----------------------|-----------------------|-----------------------|-----------------------|
| corporate culture   | <input type="radio"/>  | <input type="radio"/> | <input type="radio"/> | <input type="radio"/> | <input type="radio"/> |
| product development | <input type="radio"/>  | <input type="radio"/> | <input type="radio"/> | <input type="radio"/> | <input type="radio"/> |
| financial success   | <input type="radio"/>  | <input type="radio"/> | <input type="radio"/> | <input type="radio"/> | <input type="radio"/> |
| business model      | <input type="radio"/>  | <input type="radio"/> | <input type="radio"/> | <input type="radio"/> | <input type="radio"/> |
| product marketing   | <input type="radio"/>  | <input type="radio"/> | <input type="radio"/> | <input type="radio"/> | <input type="radio"/> |

Relation2 How much do you think [Company X]'s corporate culture is related its other aspects below?

|                     | Not at all related (1) | Slightly related (2)  | Somewhat related (3)  | Very related (4)      | Extremely related (5) |
|---------------------|------------------------|-----------------------|-----------------------|-----------------------|-----------------------|
| product development | <input type="radio"/>  | <input type="radio"/> | <input type="radio"/> | <input type="radio"/> | <input type="radio"/> |
| financial success   | <input type="radio"/>  | <input type="radio"/> | <input type="radio"/> | <input type="radio"/> | <input type="radio"/> |
| business model      | <input type="radio"/>  | <input type="radio"/> | <input type="radio"/> | <input type="radio"/> | <input type="radio"/> |
| product marketing   | <input type="radio"/>  | <input type="radio"/> | <input type="radio"/> | <input type="radio"/> | <input type="radio"/> |

Relation3 How much do you think [Company X]'s product development is related its other aspects below?

|                   | Not at all related (1) | Slightly related (2)  | Somewhat related (3)  | Very related (4)      | Extremely related (5) |
|-------------------|------------------------|-----------------------|-----------------------|-----------------------|-----------------------|
| financial success | <input type="radio"/>  | <input type="radio"/> | <input type="radio"/> | <input type="radio"/> | <input type="radio"/> |
| business model    | <input type="radio"/>  | <input type="radio"/> | <input type="radio"/> | <input type="radio"/> | <input type="radio"/> |
| product marketing | <input type="radio"/>  | <input type="radio"/> | <input type="radio"/> | <input type="radio"/> | <input type="radio"/> |

Relation4 How much do you think [Company X]'s financial success is related its other aspects below?

|                   | Not at all related (1) | Slightly related (2)  | Somewhat related (3)  | Very related (4)      | Extremely related (5) |
|-------------------|------------------------|-----------------------|-----------------------|-----------------------|-----------------------|
| business model    | <input type="radio"/>  | <input type="radio"/> | <input type="radio"/> | <input type="radio"/> | <input type="radio"/> |
| product marketing | <input type="radio"/>  | <input type="radio"/> | <input type="radio"/> | <input type="radio"/> | <input type="radio"/> |

Relation5 How much do you think [Company X]'s business model is related its other aspects below?

|                   | Not at all related (1) | Slightly related (2)  | Somewhat related (3)  | Very related (4)      | Extremely related (5) |
|-------------------|------------------------|-----------------------|-----------------------|-----------------------|-----------------------|
| product marketing | <input type="radio"/>  | <input type="radio"/> | <input type="radio"/> | <input type="radio"/> | <input type="radio"/> |

Relation6 How does [Company X]'s online community relate to its business model?

Relation7 What is the role of the Street Team program in [Company X]'s financial success?

Buss\_Prces Below are the different steps of [Company X]' business process. Drag and drop the steps in order.

- \_\_\_\_\_ Design selection (1)
- \_\_\_\_\_ Design submission review (2)
- \_\_\_\_\_ Content management system (3)
- \_\_\_\_\_ Proofing and printing (4)
- \_\_\_\_\_ Distribution (5)

KeyElement According to [Company X], which of the following are key elements of its corporate culture (choose all apply)?

- Communication
- Fairness
- Transparency
- Fun
- Teamwork
- Hard work
- Deadlines authorized by the managers
- Employee autonomy

Community According to [Company X], which of the following is something its online community CANNOT do (choose all the apply)?

- Create designs for t-shirts
- Vote on designs
- Buy t-shirts
- Dislike others' designs
- Recommend t-shirts to other people online
- Earn credits for future [Company X] purchases
- Write on the [Company X] blog
- Impact [Company X] leadership's the decision making about the future of the company
- Communicate with [Company X] employees
- Fire [Company X] employees







Interest How interested are you in making the presentations in the future using the tool or the format you used today?

- Extremely uninterested (1)
- Somewhat uninterested (2)
- Slightly uninterested (3)
- Neutral (4)
- Slightly interested (5)
- Somewhat interested (6)
- Extremely interested (7)

Recommend How likely are you to recommend the presentation tool or presentation format you used to others to make professional presentations?

- Extremely unlikely (1)
- Somewhat unlikely (2)
- Slightly unlikely (3)
- Neutral (4)
- Slightly likely (5)
- Somewhat likely (6)
- Extremely likely (7)
