# Supplementary material for: Does a presentation’s medium affect its message? PowerPoint, Prezi, and oral presentations
Source: PubMed Central journal article supplement (PMC5497950; doi:10.1371/journal.pone.0178774), 2017-07-05
Supplement: pone.0178774.s005.pdf [file pone.0178774.s005.pdf]

Hello Thank you for participating in this study! Please tell us a little bit about yourself.

MTurk ID Please enter your MTurk ID below:

Gender What is your gender?

- Female (1)
- Male (2)

Age How old are you (in years)? Please enter only a number.

If How old are you? Is Less Than 18, Then Skip To End of Survey

Language Are you a native English speaker?

- Yes (1)
- No (2)

If no Is Selected, Then Skip To End of Survey

Education What is the highest level of education you completed?

- Did not complete high school (1)
- High school (or equivalent) (2)
- Some college (or associate degree) (3)
- Bachelor's degree (4)
- Master's degree (5)
- Doctoral or professional degree (6)

Profession If you are employed, what is your profession? (if you are not employed, please skip this question)

Buss-experience How experienced are you with concepts and practices from the business world, such as strategy, innovation, product development, sales, and marketing?

- Not at all experienced (1)
- Slightly experienced (2)
- Somewhat experienced (3)
- Very experienced (4)
- Extremely experienced (5)

Student? Are you currently a student in a degree program?

- Yes. I am pursuing a degree in: (1) \_\_\_\_\_
- No (0)

[Present background material]

Familiarity How familiar are you with the company [Company X]?

- Not at all familiar (1)
- Slightly familiar (2)
- Somewhat familiar (3)
- Very familiar (4)
- Extremely familiar (5)

Trap1 What product does [Company X] company sell?

- Cars (0)
- T-shirts (1)
- Backpacks (0)
- Computers (0)
- Socks (0)

If T-shirts Is Not Selected, Then Skip To End of Survey

Affective1

|                                                                      | Not at all<br>(1)     | A little (2)          | Somewhat<br>(3)       | Very much<br>(4)      | Completely<br>(5)     |
|----------------------------------------------------------------------|-----------------------|-----------------------|-----------------------|-----------------------|-----------------------|
| How engaging did you find this background material?                  | <input type="radio"/> | <input type="radio"/> | <input type="radio"/> | <input type="radio"/> | <input type="radio"/> |
| How much did you enjoy this background material?                     | <input type="radio"/> | <input type="radio"/> | <input type="radio"/> | <input type="radio"/> | <input type="radio"/> |
| How much did you pay attention to this background material?          | <input type="radio"/> | <input type="radio"/> | <input type="radio"/> | <input type="radio"/> | <input type="radio"/> |
| How difficult was it for you to understand this background material? | <input type="radio"/> | <input type="radio"/> | <input type="radio"/> | <input type="radio"/> | <input type="radio"/> |

[G4 is the control group]

[Participants are randomly shown one of the three videos]

Info-g4vd1 Before you decide what to do about i-Mart's offer to [Company X], we would like you to watch an unrelated presentation and briefly answer some questions about it.

G4-video\_1 [https://s3.amazonaws.com/prz2/G4\\_V1.mp4](https://s3.amazonaws.com/prz2/G4_V1.mp4)

Info-g4vd2 Before you decide what to do about i-Mart's offer to [Company X], we would like you to watch an unrelated presentation and briefly answer some questions about it.

G4\_video\_2 [https://s3.amazonaws.com/prz2/G4\\_V2.mp4](https://s3.amazonaws.com/prz2/G4_V2.mp4)

Info-g4vd3 Before you decide what to do about i-Mart's offer to [Company X], we would like you to watch an unrelated presentation and briefly answer some questions about it.

G4\_video\_3 [https://s3.amazonaws.com/prz2/G4\\_V3.mp4](https://s3.amazonaws.com/prz2/G4_V3.mp4)

G4-affect

|                                                        | Not at all<br>(1)     | A little (2)          | Somewhat<br>(3)       | Very much<br>(4)      | Completely<br>(5)     |
|--------------------------------------------------------|-----------------------|-----------------------|-----------------------|-----------------------|-----------------------|
| How engaging did you find this video?                  | <input type="radio"/> | <input type="radio"/> | <input type="radio"/> | <input type="radio"/> | <input type="radio"/> |
| How much did you enjoy this video?                     | <input type="radio"/> | <input type="radio"/> | <input type="radio"/> | <input type="radio"/> | <input type="radio"/> |
| How much did you pay attention to this video?          | <input type="radio"/> | <input type="radio"/> | <input type="radio"/> | <input type="radio"/> | <input type="radio"/> |
| How difficult was it for you to understand this video? | <input type="radio"/> | <input type="radio"/> | <input type="radio"/> | <input type="radio"/> | <input type="radio"/> |

G4-overall Overall, how \_\_\_\_\_ was this presentation?

|            | Not at all<br>(1)     | Slightly (2)          | Somewhat<br>(3)       | Very (4)              | Extremely<br>(5)      |
|------------|-----------------------|-----------------------|-----------------------|-----------------------|-----------------------|
| Organized  | <input type="radio"/> | <input type="radio"/> | <input type="radio"/> | <input type="radio"/> | <input type="radio"/> |
| Engaging   | <input type="radio"/> | <input type="radio"/> | <input type="radio"/> | <input type="radio"/> | <input type="radio"/> |
| Persuasive | <input type="radio"/> | <input type="radio"/> | <input type="radio"/> | <input type="radio"/> | <input type="radio"/> |
| Effective  | <input type="radio"/> | <input type="radio"/> | <input type="radio"/> | <input type="radio"/> | <input type="radio"/> |

G4-present Overall, how \_\_\_\_\_ was this presenter?

|               | Not at all<br>(1)     | Slightly (2)          | Somewhat<br>(3)       | Very (4)              | Extremely<br>(5)      |
|---------------|-----------------------|-----------------------|-----------------------|-----------------------|-----------------------|
| Organized     | <input type="radio"/> | <input type="radio"/> | <input type="radio"/> | <input type="radio"/> | <input type="radio"/> |
| Engaging      | <input type="radio"/> | <input type="radio"/> | <input type="radio"/> | <input type="radio"/> | <input type="radio"/> |
| Persuasive    | <input type="radio"/> | <input type="radio"/> | <input type="radio"/> | <input type="radio"/> | <input type="radio"/> |
| Effective     | <input type="radio"/> | <input type="radio"/> | <input type="radio"/> | <input type="radio"/> | <input type="radio"/> |
| Confident     | <input type="radio"/> | <input type="radio"/> | <input type="radio"/> | <input type="radio"/> | <input type="radio"/> |
| Enthusiastic  | <input type="radio"/> | <input type="radio"/> | <input type="radio"/> | <input type="radio"/> | <input type="radio"/> |
| Knowledgeable | <input type="radio"/> | <input type="radio"/> | <input type="radio"/> | <input type="radio"/> | <input type="radio"/> |
| Professional  | <input type="radio"/> | <input type="radio"/> | <input type="radio"/> | <input type="radio"/> | <input type="radio"/> |
| Nervous       | <input type="radio"/> | <input type="radio"/> | <input type="radio"/> | <input type="radio"/> | <input type="radio"/> |
| Boring        | <input type="radio"/> | <input type="radio"/> | <input type="radio"/> | <input type="radio"/> | <input type="radio"/> |

G4-media Overall, how much did this presentation material have the following?

|                               | Not enough (1)        | About right (2)       | Too much (3)          |
|-------------------------------|-----------------------|-----------------------|-----------------------|
| Text                          | <input type="radio"/> | <input type="radio"/> | <input type="radio"/> |
| Graphs                        | <input type="radio"/> | <input type="radio"/> | <input type="radio"/> |
| Images                        | <input type="radio"/> | <input type="radio"/> | <input type="radio"/> |
| Animations (e.g.,<br>zooming) | <input type="radio"/> | <input type="radio"/> | <input type="radio"/> |

G4-summary Please summarize the presentation. What were the main points?  
(minimum acceptable length for the answer - 50 characters)

G4-comment Do you have any comments about the presenter? How do you think s/he  
can improve the presentation?(minimum acceptable length for the answer - 50  
characters)

MetaCog1 How much do you think you understand the situation with [Company X] and i-Mart?

- Not at all (1)
- Slightly (2)
- Somewhat (3)
- Mostly (4)
- Fully (5)

MetaCog1 You are now going to be quizzed on the content you just studied. Please rate how well you think you will perform on this quiz.

- Extremely Poorly (1)
- Very Poorly (2)
- Somewhat Poorly (3)
- Fair (4)
- Somewhat Well (5)
- Very Well (6)
- Extremely Well (7)

Decision1 What do you think [Company X] should do?

- Definitely reject i-Mart's offer (1)
- Probably reject i-Mart's offer (2)
- Possibly reject i-Mart's offer (3)
- Possibly accept i-Mart's offer (4)
- Probably accept i-Mart's offer (5)
- Definitely accept i-Mart's offer (6)

Reason1 Why do you think [Company X] should accept or reject i-Mart's offer? (minimum acceptable length for the answer - 100 characters)

Pro1 What are the pros of accepting i-Mart's offer? (minimum acceptable length for the answer - 50 characters)

Con1 What are the cons of accepting i-Mart's offer? (minimum acceptable length for the answer - 50 characters)

Fact-# According to the background materials and the presentation, approximately how many members does [Company X] have?

- 500,000 (1)
- 150,000 (0)
- 25,000 (0)
- 3,500 (0)
- 1.5 million (0)

Fact-state [Company X]'s customer base is concentrated in:

- The South (0)
- The East Coast (0)
- The West Coast (0)
- Both the East and West Coast (1)
- The Midwest (0)

Fact-profit Between 2000 and 2007, [Company X]'s revenue:

- Decreased dramatically (0)
- Decreased somewhat (0)
- Stayed the same (0)
- Increased somewhat (0)
- Increased dramatically (1)

Fact-chall According to the background materials, what is the biggest challenge [Company X] is facing?

- Marketing (0)
- Maintaining transparency (0)
- Community expansion (0)
- Logistics (1)
- Employee satisfaction (0)

KeyAspect1 How important are the below aspects of [Company X]'s corporate culture?

|                              | Not at all important<br>(1) | Slightly important<br>(2) | Somewhat important<br>(3) | Very important<br>(4) | Extremely important<br>(5) |
|------------------------------|-----------------------------|---------------------------|---------------------------|-----------------------|----------------------------|
| Openness and communication   | <input type="radio"/>       | <input type="radio"/>     | <input type="radio"/>     | <input type="radio"/> | <input type="radio"/>      |
| Trust and accountability     | <input type="radio"/>       | <input type="radio"/>     | <input type="radio"/>     | <input type="radio"/> | <input type="radio"/>      |
| Fun and hard work            | <input type="radio"/>       | <input type="radio"/>     | <input type="radio"/>     | <input type="radio"/> | <input type="radio"/>      |
| Customer service             | <input type="radio"/>       | <input type="radio"/>     | <input type="radio"/>     | <input type="radio"/> | <input type="radio"/>      |
| Health and wellbeing         | <input type="radio"/>       | <input type="radio"/>     | <input type="radio"/>     | <input type="radio"/> | <input type="radio"/>      |
| Environmental sustainability | <input type="radio"/>       | <input type="radio"/>     | <input type="radio"/>     | <input type="radio"/> | <input type="radio"/>      |
| Diversity and inclusion      | <input type="radio"/>       | <input type="radio"/>     | <input type="radio"/>     | <input type="radio"/> | <input type="radio"/>      |

Trap2 Are you a human? Please answer the following math question: 84 plus 27 =



Reason1 For each of the below items, please indicate whether you think it is a reason for [Company X] to accept i-Mart's offer, reject i-Mart's offer, or neither.

|                                                                            | reason to accept offer | reason to reject offer | neither               |
|----------------------------------------------------------------------------|------------------------|------------------------|-----------------------|
| It's a way to advertise, to bring people to the site                       | <input type="radio"/>  | <input type="radio"/>  | <input type="radio"/> |
| Migrating to a new medium is a natural development                         | <input type="radio"/>  | <input type="radio"/>  | <input type="radio"/> |
| It's a way to outsource distribution to a retailer                         | <input type="radio"/>  | <input type="radio"/>  | <input type="radio"/> |
| It's a grown up move, a way for [Company X] to mature as a company         | <input type="radio"/>  | <input type="radio"/>  | <input type="radio"/> |
| [Company X] community might become less exclusive                          | <input type="radio"/>  | <input type="radio"/>  | <input type="radio"/> |
| Existing community members might think that [Company X] is a "sellout"     | <input type="radio"/>  | <input type="radio"/>  | <input type="radio"/> |
| Designs and community might become less creative                           | <input type="radio"/>  | <input type="radio"/>  | <input type="radio"/> |
| [Company X] might become less democratic                                   | <input type="radio"/>  | <input type="radio"/>  | <input type="radio"/> |
| i-Mart might bias choices of t-shirts                                      | <input type="radio"/>  | <input type="radio"/>  | <input type="radio"/> |
| Company culture is not suited to deal with i-Mart                          | <input type="radio"/>  | <input type="radio"/>  | <input type="radio"/> |
| Employees don't want to work for company that is just a supplier to i-Mart | <input type="radio"/>  | <input type="radio"/>  | <input type="radio"/> |
| Logistics: [Company X] won't be able to handle the increased               | <input type="radio"/>  | <input type="radio"/>  | <input type="radio"/> |



|                                                           |                       |                       |                       |
|-----------------------------------------------------------|-----------------------|-----------------------|-----------------------|
| production demand                                         | <input type="radio"/> | <input type="radio"/> | <input type="radio"/> |
| Company might be flooded with inferior design submissions | <input type="radio"/> | <input type="radio"/> | <input type="radio"/> |
| [Company X] will sell more t-shirts and increase profits  | <input type="radio"/> | <input type="radio"/> | <input type="radio"/> |
| The community is worth more than selling more t-shirts    | <input type="radio"/> | <input type="radio"/> | <input type="radio"/> |
| Designers will have a broader audience for their work     | <input type="radio"/> | <input type="radio"/> | <input type="radio"/> |

Relate1.1 How much do you think [Company X]'s online community is related its other aspects below?

|                     | Not at all related (1) | Slightly related (2)  | Somewhat related (3)  | Very related (4)      | Extremely related (5) |
|---------------------|------------------------|-----------------------|-----------------------|-----------------------|-----------------------|
| corporate culture   | <input type="radio"/>  | <input type="radio"/> | <input type="radio"/> | <input type="radio"/> | <input type="radio"/> |
| product development | <input type="radio"/>  | <input type="radio"/> | <input type="radio"/> | <input type="radio"/> | <input type="radio"/> |
| financial success   | <input type="radio"/>  | <input type="radio"/> | <input type="radio"/> | <input type="radio"/> | <input type="radio"/> |
| business model      | <input type="radio"/>  | <input type="radio"/> | <input type="radio"/> | <input type="radio"/> | <input type="radio"/> |
| product marketing   | <input type="radio"/>  | <input type="radio"/> | <input type="radio"/> | <input type="radio"/> | <input type="radio"/> |

Relate1.2 How much do you think [Company X]'s corporate culture is related its other aspects below?

|                     | Not at all related (1) | Slightly related (2)  | Somewhat related (3)  | Very related (4)      | Extremely related (5) |
|---------------------|------------------------|-----------------------|-----------------------|-----------------------|-----------------------|
| product development | <input type="radio"/>  | <input type="radio"/> | <input type="radio"/> | <input type="radio"/> | <input type="radio"/> |
| financial success   | <input type="radio"/>  | <input type="radio"/> | <input type="radio"/> | <input type="radio"/> | <input type="radio"/> |
| business model      | <input type="radio"/>  | <input type="radio"/> | <input type="radio"/> | <input type="radio"/> | <input type="radio"/> |
| product marketing   | <input type="radio"/>  | <input type="radio"/> | <input type="radio"/> | <input type="radio"/> | <input type="radio"/> |

Relate1.3 How much do you think [Company X]'s product development is related its other aspects below?

|                   | Not at all related (1) | Slightly related (2)  | Somewhat related (3)  | Very related (4)      | Extremely related (5) |
|-------------------|------------------------|-----------------------|-----------------------|-----------------------|-----------------------|
| financial success | <input type="radio"/>  | <input type="radio"/> | <input type="radio"/> | <input type="radio"/> | <input type="radio"/> |
| business model    | <input type="radio"/>  | <input type="radio"/> | <input type="radio"/> | <input type="radio"/> | <input type="radio"/> |
| product marketing | <input type="radio"/>  | <input type="radio"/> | <input type="radio"/> | <input type="radio"/> | <input type="radio"/> |

Relate1.4 How much do you think [Company X]'s financial success is related its other aspects below?

|                   | Not at all related (1) | Slightly related (2)  | Somewhat related (3)  | Very related (4)      | Extremely related (5) |
|-------------------|------------------------|-----------------------|-----------------------|-----------------------|-----------------------|
| business model    | <input type="radio"/>  | <input type="radio"/> | <input type="radio"/> | <input type="radio"/> | <input type="radio"/> |
| product marketing | <input type="radio"/>  | <input type="radio"/> | <input type="radio"/> | <input type="radio"/> | <input type="radio"/> |

Relate1.5 How much do you think [Company X]'s business model is related its product marketing?

|                   | Not at all related (1) | Slightly related (2)  | Somewhat related (3)  | Very related (4)      | Extremely related (5) |
|-------------------|------------------------|-----------------------|-----------------------|-----------------------|-----------------------|
| product marketing | <input type="radio"/>  | <input type="radio"/> | <input type="radio"/> | <input type="radio"/> | <input type="radio"/> |

Relate1.6 How does [Company X]' online community relate to its business model?(minimum acceptable length for the answer - 50 characters)

eval-all Overall, how \_\_\_\_\_ was this presentation?

|            | Not at all (1)        | Slightly (2)          | Somewhat (3)          | Very (4)              | Extremely (5)         |
|------------|-----------------------|-----------------------|-----------------------|-----------------------|-----------------------|
| Organized  | <input type="radio"/> | <input type="radio"/> | <input type="radio"/> | <input type="radio"/> | <input type="radio"/> |
| Engaging   | <input type="radio"/> | <input type="radio"/> | <input type="radio"/> | <input type="radio"/> | <input type="radio"/> |
| Realistic  | <input type="radio"/> | <input type="radio"/> | <input type="radio"/> | <input type="radio"/> | <input type="radio"/> |
| Persuasive | <input type="radio"/> | <input type="radio"/> | <input type="radio"/> | <input type="radio"/> | <input type="radio"/> |
| Effective  | <input type="radio"/> | <input type="radio"/> | <input type="radio"/> | <input type="radio"/> | <input type="radio"/> |

Answer If Group Is Equal to 1 Or Group Is Equal to 2

eval-visual Overall, how \_\_\_\_\_ was the visual component of this presentation (that appeared on the left half of the screen)?

|                     | Not at all<br>(1)     | Slightly (2)          | Somewhat<br>(3)       | Very (4)              | Extremely<br>(5)      |
|---------------------|-----------------------|-----------------------|-----------------------|-----------------------|-----------------------|
| Organized           | <input type="radio"/> | <input type="radio"/> | <input type="radio"/> | <input type="radio"/> | <input type="radio"/> |
| Engaging            | <input type="radio"/> | <input type="radio"/> | <input type="radio"/> | <input type="radio"/> | <input type="radio"/> |
| Persuasive          | <input type="radio"/> | <input type="radio"/> | <input type="radio"/> | <input type="radio"/> | <input type="radio"/> |
| Effective           | <input type="radio"/> | <input type="radio"/> | <input type="radio"/> | <input type="radio"/> | <input type="radio"/> |
| Dynamic             | <input type="radio"/> | <input type="radio"/> | <input type="radio"/> | <input type="radio"/> | <input type="radio"/> |
| Visually compelling | <input type="radio"/> | <input type="radio"/> | <input type="radio"/> | <input type="radio"/> | <input type="radio"/> |
| Distracting         | <input type="radio"/> | <input type="radio"/> | <input type="radio"/> | <input type="radio"/> | <input type="radio"/> |
| Informative         | <input type="radio"/> | <input type="radio"/> | <input type="radio"/> | <input type="radio"/> | <input type="radio"/> |
| Distinctive         | <input type="radio"/> | <input type="radio"/> | <input type="radio"/> | <input type="radio"/> | <input type="radio"/> |
| Boring              | <input type="radio"/> | <input type="radio"/> | <input type="radio"/> | <input type="radio"/> | <input type="radio"/> |

eval-person Overall, how \_\_\_\_\_ was this presenter (who appeared on the right half of the screen)?

|               | Not at all<br>(1)     | Slightly (2)          | Somewhat<br>(3)       | Very (4)              | Extremely<br>(5)      |
|---------------|-----------------------|-----------------------|-----------------------|-----------------------|-----------------------|
| Organized     | <input type="radio"/> | <input type="radio"/> | <input type="radio"/> | <input type="radio"/> | <input type="radio"/> |
| Engaging      | <input type="radio"/> | <input type="radio"/> | <input type="radio"/> | <input type="radio"/> | <input type="radio"/> |
| Persuasive    | <input type="radio"/> | <input type="radio"/> | <input type="radio"/> | <input type="radio"/> | <input type="radio"/> |
| Effective     | <input type="radio"/> | <input type="radio"/> | <input type="radio"/> | <input type="radio"/> | <input type="radio"/> |
| Confident     | <input type="radio"/> | <input type="radio"/> | <input type="radio"/> | <input type="radio"/> | <input type="radio"/> |
| Enthusiastic  | <input type="radio"/> | <input type="radio"/> | <input type="radio"/> | <input type="radio"/> | <input type="radio"/> |
| Knowledgeable | <input type="radio"/> | <input type="radio"/> | <input type="radio"/> | <input type="radio"/> | <input type="radio"/> |
| Professional  | <input type="radio"/> | <input type="radio"/> | <input type="radio"/> | <input type="radio"/> | <input type="radio"/> |
| Nervous       | <input type="radio"/> | <input type="radio"/> | <input type="radio"/> | <input type="radio"/> | <input type="radio"/> |
| Boring        | <input type="radio"/> | <input type="radio"/> | <input type="radio"/> | <input type="radio"/> | <input type="radio"/> |

Answer If Group Is Equal to 1 Or Group Is Equal to 2

eval-media Overall, how much did this presentation material have the following?

|                               | Not enough (-1)       | About right (0)       | Too much (1)          |
|-------------------------------|-----------------------|-----------------------|-----------------------|
| Text                          | <input type="radio"/> | <input type="radio"/> | <input type="radio"/> |
| Graphs                        | <input type="radio"/> | <input type="radio"/> | <input type="radio"/> |
| Images                        | <input type="radio"/> | <input type="radio"/> | <input type="radio"/> |
| Animations (e.g.,<br>zooming) | <input type="radio"/> | <input type="radio"/> | <input type="radio"/> |

Summarize Please summarize the presentation. What were the main selling points?  
(minimum acceptable length for the answer - 50 characters)

OE\_person Do you have any comments about the presenter? How do you think s/he can  
improve the presentation?(minimum acceptable length for the answer - 50 characters)

Answer If Group Is Equal to 1 Or Group Is Equal to 2

OE\_visuals Do you have any comments about the visual part of this presentation (that  
appeared on the left half of the video)? How do you think it can be improved? (minimum  
acceptable length for the answer - 50 characters)

Vid-Quality Please rate the quality of the presentation's audio and video.

|       | Very Bad (1)          | Bad (2)               | Okay (3)              | Good (4)              | Very Good<br>(5)      |
|-------|-----------------------|-----------------------|-----------------------|-----------------------|-----------------------|
| Audio | <input type="radio"/> | <input type="radio"/> | <input type="radio"/> | <input type="radio"/> | <input type="radio"/> |
| Video | <input type="radio"/> | <input type="radio"/> | <input type="radio"/> | <input type="radio"/> | <input type="radio"/> |

Answer If Please rate the quality of the presentation's audio and video. - Very Bad Is  
Selected Or Please rate the quality of the presentation's audio and video. - Bad Is  
Selected

Vid-Qual2 What problems were there with the audio or video?

Transition Awesome! In the next part of the study, we would like to know your  
experiences with different types of presentations.

Note A note on language: When we use the term "presentation", we mean a formal,  
planned, and oral presentation of any duration, including a public speech, an academic  
lecture, a webinar, a class presentation, a wedding toast, a sermon, a product  
demonstration, a business presentation, and so on. Examples of things we do NOT  
mean are: a theatrical performance, an impromptu toast at dinner, and any presentation  
with no audience .When we say PowerPoint presentations, we mean presentations that





Effect\_W\_2 When somebody else gives a presentation, how effective are the following types of presentations for you?

|                   | Not at all Effective (1) | Slightly Effective (2) | Somewhat Effective (3) | Very Effective (4)    | Extremely Effective (5) | Not Applicable (99)   |
|-------------------|--------------------------|------------------------|------------------------|-----------------------|-------------------------|-----------------------|
| Oral Presentation | <input type="radio"/>    | <input type="radio"/>  | <input type="radio"/>  | <input type="radio"/> | <input type="radio"/>   | <input type="radio"/> |
| PowerPoint        | <input type="radio"/>    | <input type="radio"/>  | <input type="radio"/>  | <input type="radio"/> | <input type="radio"/>   | <input type="radio"/> |
| Prezi             | <input type="radio"/>    | <input type="radio"/>  | <input type="radio"/>  | <input type="radio"/> | <input type="radio"/>   | <input type="radio"/> |

Effect\_W\_3 When somebody else gives a presentation, how enjoyable are the following types of presentations for you?

|                   | Not at all Enjoyable (1) | Slightly Enjoyable (2) | Somewhat Enjoyable (3) | Very Enjoyable (4)    | Extremely Enjoyable (5) | Not Applicable (99)   |
|-------------------|--------------------------|------------------------|------------------------|-----------------------|-------------------------|-----------------------|
| Oral Presentation | <input type="radio"/>    | <input type="radio"/>  | <input type="radio"/>  | <input type="radio"/> | <input type="radio"/>   | <input type="radio"/> |
| PowerPoint        | <input type="radio"/>    | <input type="radio"/>  | <input type="radio"/>  | <input type="radio"/> | <input type="radio"/>   | <input type="radio"/> |
| Prezi             | <input type="radio"/>    | <input type="radio"/>  | <input type="radio"/>  | <input type="radio"/> | <input type="radio"/>   | <input type="radio"/> |

Freq\_1 In the last year, approximately how many of the following types of presentations did watch? (Please write "0" if you have not watched any)

Oral Presentation:  
 PowerPoint:  
 Prezi:

Freq\_2 In your lifetime, approximately how many of the following types of presentations did you watch? (Please write "0" if you have not watched any)

Oral Presentation:  
 PowerPoint:  
 Prezi:

Years For approximately how many years have you been watching the following types of presentations? Please write "0" if you have not watched any)

Oral Presentation:  
 PowerPoint:  
 Prezi:

Advantage Proponents of the three types of presentations claim particular advantages for each type of presentation. In the table below, try to match the presentation type with its claimed advantages. You can only select one presentation type for each advantage.

|                                                                             | Oral Presentation     | PowerPoint            | Prezi                 |
|-----------------------------------------------------------------------------|-----------------------|-----------------------|-----------------------|
| most easily allows you to create handouts and make notes to yourself        | <input type="radio"/> | <input type="radio"/> | <input type="radio"/> |
| most easily allows you to improvise during the presentation                 | <input type="radio"/> | <input type="radio"/> | <input type="radio"/> |
| best shows relationships and connections between parts of your presentation | <input type="radio"/> | <input type="radio"/> | <input type="radio"/> |
| most established, familiar, and reliable way to create visual aids          | <input type="radio"/> | <input type="radio"/> | <input type="radio"/> |
| best shows the big picture                                                  | <input type="radio"/> | <input type="radio"/> | <input type="radio"/> |
| simplicity                                                                  | <input type="radio"/> | <input type="radio"/> | <input type="radio"/> |
| best promotes personal connection between you and your audience             | <input type="radio"/> | <input type="radio"/> | <input type="radio"/> |
| most fun, dynamic, and engaging for your audience                           | <input type="radio"/> | <input type="radio"/> | <input type="radio"/> |
| most easily allows you to create tables and charts                          | <input type="radio"/> | <input type="radio"/> | <input type="radio"/> |



Disadvantage Critics of the three types of presentations claim particular disadvantages of each type of presentation. In the table below, try to match presentation type with its claimed disadvantages. You can only select one presentation type for each disadvantage.

|                                                                          | Oral Presentation     | PowerPoint            | Prezi                 |
|--------------------------------------------------------------------------|-----------------------|-----------------------|-----------------------|
| makes it easy to overload your audience with information or distractions | <input type="radio"/> | <input type="radio"/> | <input type="radio"/> |
| encourages overuse of bullet points and text                             | <input type="radio"/> | <input type="radio"/> | <input type="radio"/> |
| expensive                                                                | <input type="radio"/> | <input type="radio"/> | <input type="radio"/> |
| unsophisticated                                                          | <input type="radio"/> | <input type="radio"/> | <input type="radio"/> |
| does not allow for visual communication or learning                      | <input type="radio"/> | <input type="radio"/> | <input type="radio"/> |
| hard to learn                                                            | <input type="radio"/> | <input type="radio"/> | <input type="radio"/> |
| provides no record of the presentation for later sharing or referencing  | <input type="radio"/> | <input type="radio"/> | <input type="radio"/> |
| encourages unoriginal, linear presentations                              | <input type="radio"/> | <input type="radio"/> | <input type="radio"/> |
| can disorient your audience                                              | <input type="radio"/> | <input type="radio"/> | <input type="radio"/> |

Functionality Please read the statements below and indicate whether or not Prezi and PowerPoint software has this functionality. You can select one or both software tool for each functionality.

|                                                                               | Prezi                    | PowerPoint               |
|-------------------------------------------------------------------------------|--------------------------|--------------------------|
| Add times to slides/frames                                                    | <input type="checkbox"/> | <input type="checkbox"/> |
| Use transformation tool to move, size and rotate content in your presentation | <input type="checkbox"/> | <input type="checkbox"/> |
| Create custom backgrounds                                                     | <input type="checkbox"/> | <input type="checkbox"/> |
| Use (+) button on the screen to zoom in                                       | <input type="checkbox"/> | <input type="checkbox"/> |
| Record narration while presenting                                             | <input type="checkbox"/> | <input type="checkbox"/> |
| Click "Present" button to start presenting                                    | <input type="checkbox"/> | <input type="checkbox"/> |
| Use path points to set sequence of your presentation content                  | <input type="checkbox"/> | <input type="checkbox"/> |
| Insert videos from YouTube                                                    | <input type="checkbox"/> | <input type="checkbox"/> |
| Click on the objects to zoom around while editing your presentation           | <input type="checkbox"/> | <input type="checkbox"/> |
| Import content from other presentations                                       | <input type="checkbox"/> | <input type="checkbox"/> |
| Print handouts                                                                | <input type="checkbox"/> | <input type="checkbox"/> |
| Import presentations that were created using other presentation software      | <input type="checkbox"/> | <input type="checkbox"/> |
| Double click to insert text                                                   | <input type="checkbox"/> | <input type="checkbox"/> |
| Stop presentation by pressing ESC                                             | <input type="checkbox"/> | <input type="checkbox"/> |

Next, you will rate the quality of short presentations. Some presentations do not have narrative. This is on purpose. We want you to focus on the visual aspects on these presentations. Click next, when you are ready.

PPT1 Please watch the four videos below, one at a time. When you are done watching them all, rank them from best to worst by clicking the button on the right side (1=best, 2 = good, 3 = bad, 4=worst). Feel free to watch the videos more than once if that helps you better evaluate them.

|                                                                                                                 | 1 | 2 | 3 | 4 |
|-----------------------------------------------------------------------------------------------------------------|---|---|---|---|
| PPT1_video1 <a href="https://s3.amazonaws.com/prz/Graphic_1.mp4">https://s3.amazonaws.com/prz/Graphic_1.mp4</a> |   |   |   |   |
| PPT1_video2 <a href="https://s3.amazonaws.com/prz/Graphic_2.mp4">https://s3.amazonaws.com/prz/Graphic_2.mp4</a> |   |   |   |   |
| PPT1_video3 <a href="https://s3.amazonaws.com/prz/Graphic_3.mp4">https://s3.amazonaws.com/prz/Graphic_3.mp4</a> |   |   |   |   |
| PPT1_video4 <a href="https://s3.amazonaws.com/prz/Graphic_4.mp4">https://s3.amazonaws.com/prz/Graphic_4.mp4</a> |   |   |   |   |

Note *The submit button is disabled for the time that will take you to view the videos.*

Speaking1 Please watch the four videos below, one at a time. When you are done watching them all, rank them from best to worst by clicking the button on the right side (1=best, 2=good, 3=bad, 4=worst). Feel free to watch the videos more than once if that helps you better evaluate them.

|                                                  | 1 | 2 | 3 | 4 |
|--------------------------------------------------|---|---|---|---|
| Speaking1_video1<br>[video available by request] |   |   |   |   |
| Speaking1_video2<br>[video available by request] |   |   |   |   |
| Speaking1_video3<br>[video available by request] |   |   |   |   |
| Speaking1_video4<br>[video available by request] |   |   |   |   |

Note *The submit button is disabled for the time that will take you to view the videos.*

Prezi1 Please watch the four videos below, one at a time. When you are done watching them all, rank them from best to worst by clicking the button on the right side (1=best, 2 = good, 3 = bad, 4=worst). Feel free to watch the videos more than once if that helps you better evaluate them.

|                                                                                                                     | 1 | 2 | 3 | 4 |
|---------------------------------------------------------------------------------------------------------------------|---|---|---|---|
| Prezi1_video1 <a href="https://s3.amazonaws.com/prz/Relation_1.mp4">https://s3.amazonaws.com/prz/Relation_1.mp4</a> |   |   |   |   |
| Prezi1_video2 <a href="https://s3.amazonaws.com/prz/Relation_2.mp4">https://s3.amazonaws.com/prz/Relation_2.mp4</a> |   |   |   |   |
| Prezi1_video3 <a href="https://s3.amazonaws.com/prz/Relation_3.mp4">https://s3.amazonaws.com/prz/Relation_3.mp4</a> |   |   |   |   |
| Prezi1_video4 <a href="https://s3.amazonaws.com/prz/Relation_4.mp4">https://s3.amazonaws.com/prz/Relation_4.mp4</a> |   |   |   |   |

Note *The submit button is disabled for the time that will take you to view the videos.*

PPT2 Please watch the four videos below, one at a time. When you are done watching them all, rank them from best to worst by clicking the button on the right side (1=best, 2 = good, 3 = bad, 4=worst). Feel free to watch the videos more than once if that helps you better evaluate them.

|                                                                                                               | 1 | 2 | 3 | 4 |
|---------------------------------------------------------------------------------------------------------------|---|---|---|---|
| PPT2_video1 <a href="https://s3.amazonaws.com/prz/charts_1.mp4">https://s3.amazonaws.com/prz/charts_1.mp4</a> |   |   |   |   |
| PPT2_video2 <a href="https://s3.amazonaws.com/prz/charts_2.mp4">https://s3.amazonaws.com/prz/charts_2.mp4</a> |   |   |   |   |
| PPT2_video3 <a href="https://s3.amazonaws.com/prz/charts_3.mp4">https://s3.amazonaws.com/prz/charts_3.mp4</a> |   |   |   |   |
| PPT2_video4 <a href="https://s3.amazonaws.com/prz/charts_4.mp4">https://s3.amazonaws.com/prz/charts_4.mp4</a> |   |   |   |   |

Note *The submit button is disabled for the time that will take you to view the videos.*

Speaking2 Please watch the four videos below, one at a time. When you are done watching them all, rank them from best to worst by clicking the button on the right side (1=best, 2=good, 3=bad, 4=worst). Feel free to watch the videos more than once if that helps you better evaluate them.

|                                                  | 1 | 2 | 3 | 4 |
|--------------------------------------------------|---|---|---|---|
| Speaking2_video1<br>[video available by request] |   |   |   |   |
| Speaking2_video2<br>[video available by request] |   |   |   |   |
| Speaking2_video3<br>[video available by request] |   |   |   |   |
| Speaking2_video4<br>[video available by request] |   |   |   |   |

Note *The submit button is disabled for the time that will take you to view the videos.*

Prezi2 Please watch the four videos below, one at a time. When you are done watching them all, rank them from best to worst by clicking the button on the right side (1=best, 2 = good, 3 = bad, 4=worst). Feel free to watch the videos more than once if that helps you better evaluate them.

|                                                                                                             | 1 | 2 | 3 | 4 |
|-------------------------------------------------------------------------------------------------------------|---|---|---|---|
| Prezi2_video1 <a href="https://s3.amazonaws.com/prz/Zoom_1.mp4">https://s3.amazonaws.com/prz/Zoom_1.mp4</a> |   |   |   |   |
| Prezi2_video2 <a href="https://s3.amazonaws.com/prz/Zoom_2.mp4">https://s3.amazonaws.com/prz/Zoom_2.mp4</a> |   |   |   |   |
| Prezi2_video3 <a href="https://s3.amazonaws.com/prz/Zoom_3.mp4">https://s3.amazonaws.com/prz/Zoom_3.mp4</a> |   |   |   |   |
| Prezi2_video4 <a href="https://s3.amazonaws.com/prz/Zoom_4.mp4">https://s3.amazonaws.com/prz/Zoom_4.mp4</a> |   |   |   |   |

Note *The submit button is disabled for the time that will take you to view the videos.*

PPT3 Please watch the four videos below, one at a time. When you are done watching them all, rank them from best to worst by clicking the button on the right side (1=best, 2=good, 3=bad, 4=worst). Feel free to watch the videos more than once if that helps you better evaluate them.

|                                                                                                                      | 1 | 2 | 3 | 4 |
|----------------------------------------------------------------------------------------------------------------------|---|---|---|---|
| PPT3_video1<br><a href="https://www.youtube.com/watch?v=T9NntA2Ny4A">https://www.youtube.com/watch?v=T9NntA2Ny4A</a> |   |   |   |   |
| PPT3_video2<br><a href="https://www.youtube.com/watch?v=tNL2nZ4nZ7c">https://www.youtube.com/watch?v=tNL2nZ4nZ7c</a> |   |   |   |   |
| PPT3_video3<br><a href="https://www.youtube.com/watch?v=atQSf4ON6Xs">https://www.youtube.com/watch?v=atQSf4ON6Xs</a> |   |   |   |   |
| PPT3_video4<br><a href="https://www.youtube.com/watch?v=liXffWyMhXk">https://www.youtube.com/watch?v=liXffWyMhXk</a> |   |   |   |   |

Note *The submit button is disabled for the time that will take you to view the videos.*

Speaking3 Please watch the four videos below, one at a time. When you are done watching them all, rank them from best to worst by clicking the button on the right side (1=best, 2=good, 3=bad, 4=worst). Feel free to watch the videos more than once if that helps you better evaluate them.

|                                                  | 1 | 2 | 3 | 4 |
|--------------------------------------------------|---|---|---|---|
| Speaking3_video1<br>[video available by request] |   |   |   |   |
| Speaking3_video2<br>[video available by request] |   |   |   |   |
| Speaking3_video3<br>[video available by request] |   |   |   |   |
| Speaking3_video4<br>[video available by request] |   |   |   |   |

Note *The submit button is disabled for the time that will take you to view the videos.*

Prezi3 Please watch the four videos below, one at a time. When you are done watching them all, rank them from best to worst by clicking the button on the right side (1=best, 2 = good, 3 = bad, 4=worst). Feel free to watch the videos more than once if that helps you better evaluate them.

|                                                                                                                     | 1 | 2 | 3 | 4 |
|---------------------------------------------------------------------------------------------------------------------|---|---|---|---|
| Prezi3_video1 <a href="https://s3.amazonaws.com/prz/metaphor_1.mp4">https://s3.amazonaws.com/prz/metaphor_1.mp4</a> |   |   |   |   |
| Prezi3_video2 <a href="https://s3.amazonaws.com/prz/metaphor_2.mp4">https://s3.amazonaws.com/prz/metaphor_2.mp4</a> |   |   |   |   |
| Prezi3_video3 <a href="https://s3.amazonaws.com/prz/metaphor_3.mp4">https://s3.amazonaws.com/prz/metaphor_3.mp4</a> |   |   |   |   |
| Prezi3_video4 <a href="https://s3.amazonaws.com/prz/metaphor_4.mp4">https://s3.amazonaws.com/prz/metaphor_4.mp4</a> |   |   |   |   |

Note *The submit button is disabled for the time that will take you to view the videos.*
